# Supplementary material for: Evaluating the Contribution of the Cause of Kidney Disease to Prognosis in CKD: Results From the Study of Heart and Renal Protection (SHARP)
Source: PubMed Central journal article supplement (PMC4068325; doi:10.1053/j.ajkd.2013.12.013), 2014-07
Supplement: mmc2.pdf [file mmc2.pdf]

**Table S2: Renal progression by cause of kidney disease, among 5990 patients not on dialysis at randomisation and with a classified baseline cause of renal disease**

|                                                                  | Other recorded diagnoses |                    |                      |              |                |                       |                         | Other recorded diagnoses subtotal |
|------------------------------------------------------------------|--------------------------|--------------------|----------------------|--------------|----------------|-----------------------|-------------------------|-----------------------------------|
|                                                                  | Cystic kidney disease    | Glomerulonephritis | Diabetic nephropathy | Hypertensive | Pyelonephritis | Other known diagnosis | Classified as 'unknown' |                                   |
| Number randomised                                                | 675                      | 1049               | 886                  | 993          | 404            | 1197                  | 786                     | 3380                              |
| Total person years for ESRD                                      | 1942                     | 3711               | 2536                 | 3541         | 1504           | 4238                  | 2862                    | 12145                             |
| Mean annual rate of change in eGFR (SD)                          | -3.8 (2.5)               | -1.9 (3.6)         | -2.5 (4.8)           | -1.4 (3.4)   | -0.9 (2.3)     | -1.1 (3.3)            | -1.2 (3.0)              | -1.2 (3.2)                        |
| Excluded from calculation of mean annual rate of change in eGFR* | 164 (24%)                | 190 (18%)          | 244 (28%)            | 175 (18%)    | 60 (15%)       | 252 (21%)             | 126 (16%)               | 613 (18%)                         |
| Number of first events (% per year)                              |                          |                    |                      |              |                |                       |                         |                                   |
| ESRD                                                             | 454 (23%)                | 378 (10%)          | 309 (12%)            | 277 (8%)     | 122 (8%)       | 329 (8%)              | 211 (7%)                | 939 (8%)                          |
| Death before ESRD                                                | 21 (1%)                  | 97 (3%)            | 206 (8%)             | 136 (4%)     | 42 (3%)        | 186 (4%)              | 114 (4%)                | 478 (4%)                          |
| ESRD or death                                                    | 475 (24%)                | 475 (13%)          | 514 (20%)            | 413 (12%)    | 164 (11%)      | 515 (12%)             | 325 (11%)               | 1417 (12%)                        |
| Any death                                                        | 57 (3%)                  | 154 (4%)           | 315 (12%)            | 197 (6%)     | 65 (4%)        | 254 (6%)              | 171 (6%)                | 687 (6%)                          |

\*Patients with fewer than three follow-up creatinine measurements or those with "poorly fitting slopes" (see methods) were excluded.
