# Supplementary material for: Evaluating the Contribution of the Cause of Kidney Disease to Prognosis in CKD: Results From the Study of Heart and Renal Protection (SHARP)
Source: PubMed Central journal article supplement (PMC4068325; doi:10.1053/j.ajkd.2013.12.013), 2014-07
Supplement: mmc3.pdf [file mmc3.pdf]

**Table S3: Effect of adjustment for known risk factors on mean annual decrease in eGFR by cause of kidney disease**

|                                                    | Mean annual decrease in eGFR (mL/min/1.73m <sup>2</sup> /year) |                               |                                 |                                      |
|----------------------------------------------------|----------------------------------------------------------------|-------------------------------|---------------------------------|--------------------------------------|
|                                                    | Cystic kidney disease<br>(n=511)                               | Glomerulonephritis<br>(n=859) | Diabetic nephropathy<br>(n=642) | Other recorded<br>diagnoses (n=2767) |
| Unadjusted model                                   | 3.77 (3.47-4.07)                                               | 1.88 (1.64-2.11)              | 2.52 (2.25-2.79)                | 1.19 (1.06-1.32)                     |
| + age, sex, country, race and treatment allocation | 3.74 (3.43-4.05)                                               | 1.77 (1.54-2.00)              | 2.32 (2.05-2.59)                | 1.28 (1.15-1.40)                     |
| + prior vascular disease and medication            | 3.74 (3.43-4.05)                                               | 1.77 (1.53-2.00)              | 2.33 (2.06-2.61)                | 1.27 (1.14-1.40)                     |
| + lipids and smoking                               | 3.77 (3.46-4.07)                                               | 1.75 (1.52-1.99)              | 2.34 (2.07-2.61)                | 1.27 (1.14-1.40)                     |
| + blood pressure and BMI                           | 3.70 (3.39-4.01)                                               | 1.77 (1.54-2.00)              | 2.33 (2.05-2.61)                | 1.28 (1.15-1.41)                     |
| + phosphate and haemoglobin                        | 3.69 (3.38-3.99)                                               | 1.76 (1.53-1.99)              | 2.24 (1.96-2.51)                | 1.31 (1.18-1.44)                     |
| + albumin:creatinine ratio                         | 4.19 (3.89-4.48)                                               | 1.41 (1.19-1.63)              | 1.84 (1.58-2.10)                | 1.42 (1.30-1.54)                     |

\*These values based on estimated rates of change in eGFR for 4779 of the 5990 patients not on dialysis at randomisation and with a classified baseline cause of renal disease, 1161 patients with fewer than three follow-up creatinine measurements and a further 50 with "poorly fitting slopes" (see methods) were excluded.
