# Supplementary material for: Evaluating the Contribution of the Cause of Kidney Disease to Prognosis in CKD: Results From the Study of Heart and Renal Protection (SHARP)
Source: PubMed Central journal article supplement (PMC4068325; doi:10.1053/j.ajkd.2013.12.013), 2014-07
Supplement: mmc4.pdf [file mmc4.pdf]

**Figure S1: Life table plot for end stage renal disease or death, by cause of kidney disease**

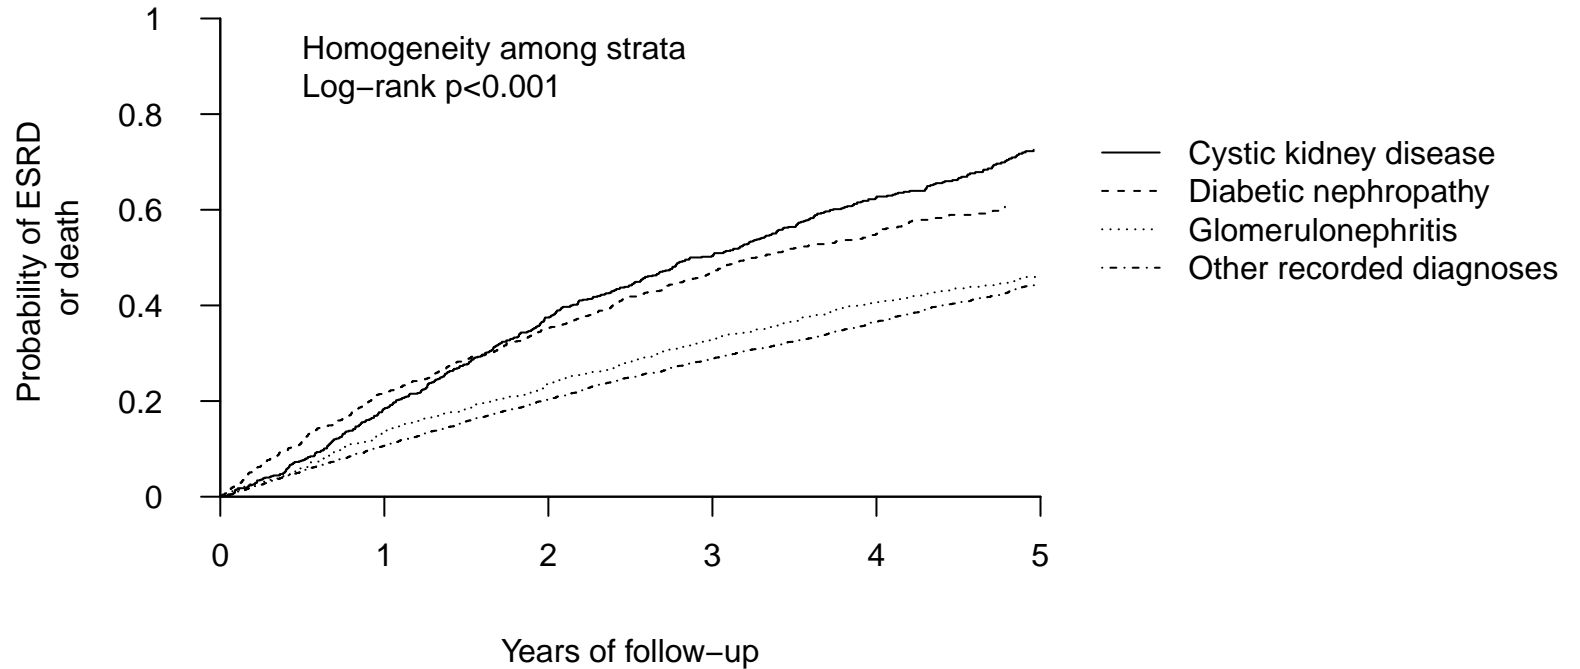

**Number at risk by cause of kidney disease**

|                          |      |      |      |      |      |     |
|--------------------------|------|------|------|------|------|-----|
| Cystic kidney disease    | 675  | 549  | 420  | 328  | 200  | 81  |
| Diabetic nephropathy     | 886  | 693  | 570  | 457  | 300  | 102 |
| Glomerulonephritis       | 1049 | 903  | 797  | 679  | 502  | 248 |
| Other recorded diagnoses | 3380 | 3004 | 2663 | 2323 | 1648 | 712 |
